# Supplementary material
Source: HighWire-hosted journal article supplement (https://jech.bmj.com/content/72/2/94)
Supplement: inline-supplementary-material-1 [file inline-supplementary-material-1.pdf]

Supplementary Table A: Multiple linear regression analyses – standardised regression coefficients and 95% confidence intervals representing the change in standard deviation of SDQ scores at age 11 per unit time increase of sedentary behaviour (60 minutes), light activity (30 minutes) and MVPA (15 minutes); minimally-adjusted and fully-adjusted models

|                    |           | Boys            |               |                 |               | Girls           |               |                 |               |
|--------------------|-----------|-----------------|---------------|-----------------|---------------|-----------------|---------------|-----------------|---------------|
|                    |           | Model 1         |               | Model 2         |               | Model 1         |               | Model 2         |               |
|                    |           | $\beta^\dagger$ | 95% CI        |
| Minimally-adjusted | sedentary | 0.050           | -0.014,0.113  | 0.039           | -0.021,0.098  | 0.022           | -0.035,0.080  | 0.032           | -0.022,0.086  |
|                    | light     | -0.016          | -0.053,0.020  | -0.016          | -0.051,0.020  | -0.008          | -0.044,0.029  | -0.013          | -0.048,0.023  |
|                    | MVPA      | -0.033          | -0.071,0.004  | -0.023          | -0.056,0.011  | -0.019          | -0.058,0.020  | -0.026          | -0.060,0.008  |
| Fully-adjusted     | sedentary | 0.119 ***       | 0.049,0.189   | 0.102 **        | 0.036,0.168   | 0.045           | -0.009,0.098  | 0.056 *         | 0.005,0.107   |
|                    | light     | -0.053 *        | -0.097,-0.009 | -0.050 *        | -0.091,-0.010 | -0.040 *        | -0.075,-0.005 | -0.047 *        | -0.083,-0.010 |
|                    | MVPA      | -0.061 **       | -0.101,-0.021 | -0.048 **       | -0.083,-0.014 | 0.007           | -0.038,0.052  | 0.003           | -0.037,0.043  |
| Minimally-adjusted | sedentary | -0.049          | -0.129,0.031  | -0.064          | -0.140,0.012  | -0.052          | -0.107,0.003  | -0.019          | -0.073,0.035  |
|                    | light     | -0.005          | -0.050,0.039  | 0.01            | -0.035,0.054  | 0.026           | -0.011,0.063  | 0.01            | -0.026,0.046  |
|                    | MVPA      | 0.060 **        | 0.020,0.101   | 0.059 **        | 0.021,0.097   | 0.033 *         | 0.002,0.064   | 0.013           | -0.019,0.045  |
| Fully-adjusted     | sedentary | -0.141 ***      | -0.192,-0.090 | -0.142 ***      | -0.194,-0.089 | -0.131 ***      | -0.180,-0.083 | -0.122 ***      | -0.169,-0.075 |
|                    | light     | 0.063 ***       | 0.028,0.097   | 0.069 ***       | 0.035,0.103   | 0.079 ***       | 0.046,0.112   | 0.075 ***       | 0.043,0.106   |
|                    | MVPA      | 0.072 ***       | 0.040,0.104   | 0.067 ***       | 0.037,0.097   | 0.051 ***       | 0.024,0.078   | 0.042 **        | 0.015,0.069   |
| Minimally-adjusted | sedentary | -0.022          | -0.080,0.035  | -0.035          | -0.090,0.020  | -0.050          | -0.102,0.001  | -0.031          | -0.078,0.016  |
|                    | light     | 0.005           | -0.030,0.039  | 0.012           | -0.021,0.046  | 0.027           | -0.008,0.062  | 0.017           | -0.016,0.050  |
|                    | MVPA      | 0.018           | -0.017,0.053  | 0.023           | -0.009,0.054  | 0.026           | -0.005,0.057  | 0.013           | -0.015,0.041  |

Model 1) Adjusted for age, season, Total Difficulties at age 7

Model 2) Adjusted for limiting illness, SEN, weight status, self-esteem, ethnicity, income, siblings, family structure, maternal education, maternal depression, maternal employment, BAS pattern construction, BAS reading

\*  $p < 0.05$ , \*\*  $p < 0.01$ , \*\*\*  $p < 0.001$

† Standardised coefficient; number of standard deviations per unit of PA or sedentary time
